# Supplementary material for: First-Principles Study on Mechanical and Optical Behavior of Plutonium Oxide under Typical Structural Phases and Vacancy Defects
Source: MDPI journal article supplement (doi:10.3390/ma15217785), 2022-11-04
Supplement: s1 [file s1]

---

# Supporting Information

## First-principles study of mechanical and optical behavior of plutonium oxide under typical structural phases and vacancy defects

Jin-Xing Cheng <sup>1,\*</sup>, Fei Yang <sup>2</sup>, Qing-Bo Wang <sup>1</sup>, Yuan-Yuan He <sup>2</sup>, Yi-Nuo Liu <sup>2</sup>,  
Zi-Yu Hu <sup>2,\*</sup>, Wei-Wei Wen <sup>1</sup>, You-Peng Wu <sup>1</sup>, Cheng-Yin Zheng <sup>1</sup>, Ai Yu <sup>1</sup>, Xin Lu <sup>1</sup>,  
Yue Zhang <sup>1</sup>

<sup>1</sup> Beijing Institute of high technology, Beijing 100094, China;

<sup>2</sup> College of Mathematics and Physics, Beijing University of Chemical Technology, Beijing 100029, China

\* Correspondence: chengjx@tsinghua.org.cn (J.-X.C.); huziyu@mail.buct.edu.cn (Z.-Y.H.)

**Table S1.** Energies of AFM, FM and NM for  $\beta$ -Pu<sub>2</sub>O<sub>3</sub>,  $\alpha$ -Pu<sub>2</sub>O<sub>3</sub>,  $\gamma$ -Pu<sub>2</sub>O<sub>3</sub>, PuO,  $\alpha$ -PuO<sub>2</sub>,  $\gamma$ -PuO<sub>2</sub>.

| Plutonium<br>oxide                       | AFM<br>energy(eV) | FM<br>energy(eV) | NM<br>energy(eV) |
|------------------------------------------|-------------------|------------------|------------------|
| $\beta$ -Pu <sub>2</sub> O <sub>3</sub>  | -57.565           | -57.803          | -53.971          |
| $\alpha$ -Pu <sub>2</sub> O <sub>3</sub> | -114.427          | -115.147         | -106.712         |
| $\gamma$ -Pu <sub>2</sub> O <sub>3</sub> | -56.971           | -57.476          | -53.661          |
| PuO                                      | -95.555           | -95.326          | -88.435          |
| $\alpha$ -PuO <sub>2</sub>               | -133.580          | -134.194         | -122.877         |
| $\gamma$ -PuO <sub>2</sub>               | -66.202           | -66.560          | -66.373          |

### Crystal Coordinate Lists:

#### 1. $\beta$ -Pu<sub>2</sub>O<sub>3</sub>

Beta-Pu2 O3

1.0000000000000000

3.8821335015818668 -0.0000000000000000 -0.0000000000000000

-1.9410667507909334 3.3620262332915520 0.0000000000000000

-0.0000000000000000 -0.0000000000000000 5.8473959514856864

Pu O

2 3

Direct

0.3333333429999996 0.6666666870000029 0.2392150939910920

0.6666666870000029 0.3333333429999996 0.7607849200089091

0.0000000000000000 0.0000000000000000 0.0000000000000000

0.3333333429999996 0.6666666870000029 0.6469546544250036

0.6666666870000029 0.3333333429999996 0.3530453155749937

---

## 2. $\alpha$ -Pu<sub>2</sub>O<sub>3</sub>

Alpha-Pu4 O6

1.0000000000000000

|                     |                    |                     |
|---------------------|--------------------|---------------------|
| 5.4591667217853903  | 0.0000000000000000 | -0.0000000000000000 |
| -0.0000000000000000 | 5.4591667217853903 | -0.0000000000000000 |
| 0.0000000000000000  | 0.0000000000000000 | 5.4591667217853903  |

Pu O

4 6

Direct

|                     |                     |                    |
|---------------------|---------------------|--------------------|
| 0.7500000000000000  | 0.7500000000000000  | 0.2500000000000000 |
| 0.2500000000000000  | 0.7500000000000000  | 0.7500000000000000 |
| 0.7500000000000000  | 0.2500000000000000  | 0.7500000000000000 |
| 0.2500000000000000  | 0.2500000000000000  | 0.2500000000000000 |
| 0.5000000000000000  | 0.0000000000000000  | 0.0000000000000000 |
| -0.0000000000000000 | -0.0000000000000000 | 0.5000000000000000 |
| 0.5000000000000000  | 0.0000000000000000  | 0.5000000000000000 |
| 0.0000000000000000  | 0.5000000000000000  | 0.5000000000000000 |
| -0.0000000000000000 | 0.5000000000000000  | 0.0000000000000000 |
| 0.5000000000000000  | 0.5000000000000000  | 0.0000000000000000 |

## 3. $\gamma$ -Pu<sub>2</sub>O<sub>3</sub>

Gamma-Pu2 O3

1.0000000000000000

|                    |                    |                    |
|--------------------|--------------------|--------------------|
| 3.8128837783244780 | 0.0000000000000000 | 0.0000000000000000 |
| 0.0000000000000000 | 3.8128837783244780 | 0.0000000000000000 |
| 0.0000000000000000 | 0.0000000000000000 | 5.4622533667408222 |

Pu O

2 3

Direct

|                     |                     |                     |
|---------------------|---------------------|---------------------|
| 0.5000000000000000  | -0.0000000000000000 | 0.7656124900952080  |
| -0.0000000000000000 | 0.5000000000000000  | 0.2343874799047897  |
| -0.0000000000000000 | 0.0000000000000000  | 0.0000000000000000  |
| 0.5000000000000000  | 0.5000000000000000  | -0.0000000000000000 |
| -0.0000000000000000 | 0.0000000000000000  | 0.5000000000000000  |

## 4. PuO

Pu4 O4

1.0000000000000000

|                     |                     |                     |
|---------------------|---------------------|---------------------|
| 5.1000370814982325  | 0.0000000000000000  | -0.0000000000000000 |
| -0.0000000000000000 | 5.1000370814982325  | -0.0000000000000000 |
| 0.0000000000000000  | -0.0000000000000000 | 5.1000370814982325  |

Pu O

4 4

Direct

|                    |                    |                     |
|--------------------|--------------------|---------------------|
| 0.5000000000000000 | 0.0000000000000000 | -0.0000000000000000 |
|--------------------|--------------------|---------------------|

---

|                     |                     |                    |
|---------------------|---------------------|--------------------|
| 0.5000000000000000  | 0.5000000000000000  | 0.5000000000000000 |
| -0.0000000000000000 | -0.0000000000000000 | 0.5000000000000000 |
| -0.0000000000000000 | 0.5000000000000000  | 0.0000000000000000 |
| 0.0000000000000000  | 0.0000000000000000  | 0.0000000000000000 |
| 0.0000000000000000  | 0.5000000000000000  | 0.5000000000000000 |
| 0.5000000000000000  | 0.0000000000000000  | 0.5000000000000000 |
| 0.5000000000000000  | 0.5000000000000000  | 0.0000000000000000 |

## 5. $\alpha$ -PuO<sub>2</sub>

Alpha-Pu4 O8

1.0000000000000000

|                     |                    |                     |
|---------------------|--------------------|---------------------|
| 5.4423906392051418  | 0.0000000000000000 | -0.0000000000000000 |
| 0.0000000000000000  | 5.4423906392051418 | 0.0000000000000000  |
| -0.0000000000000000 | 0.0000000000000000 | 5.4423906392051418  |

Pu O

4 8

Direct

|                     |                     |                     |
|---------------------|---------------------|---------------------|
| 0.0000000000000000  | -0.0000000000000000 | -0.0000000000000000 |
| -0.0000000000000000 | 0.5000000000000000  | 0.5000000000000000  |
| 0.5000000000000000  | 0.0000000000000000  | 0.5000000000000000  |
| 0.5000000000000000  | 0.5000000000000000  | -0.0000000000000000 |
| 0.2500000000000000  | 0.2500000000000000  | 0.7500000000000000  |
| 0.2500000000000000  | 0.7500000000000000  | 0.7500000000000000  |
| 0.2500000000000000  | 0.7500000000000000  | 0.2500000000000000  |
| 0.2500000000000000  | 0.2500000000000000  | 0.2500000000000000  |
| 0.7500000000000000  | 0.2500000000000000  | 0.2500000000000000  |
| 0.7500000000000000  | 0.7500000000000000  | 0.2500000000000000  |
| 0.7500000000000000  | 0.7500000000000000  | 0.7500000000000000  |
| 0.7500000000000000  | 0.2500000000000000  | 0.7500000000000000  |

## 6. $\gamma$ -PuO<sub>2</sub>

Gamma-Pu2 O4

1.0000000000000000

|                    |                    |                    |
|--------------------|--------------------|--------------------|
| 5.0696852698140988 | 0.0000000000000000 | 0.0000000000000000 |
| 0.0000000000000000 | 5.0696852698140988 | 0.0000000000000000 |
| 0.0000000000000000 | 0.0000000000000000 | 3.5456764326349082 |

Pu O

2 4

Direct

|                    |                    |                     |
|--------------------|--------------------|---------------------|
| 0.5000000000000000 | 0.5000000000000000 | -0.0000000000000000 |
| 0.0000000000000000 | 0.0000000000000000 | 0.5000000000000000  |
| 0.8106049711684941 | 0.8106049711684941 | -0.0000000000000000 |
| 0.1893950138315082 | 0.1893950138315082 | 0.0000000000000000  |
| 0.3106050011684966 | 0.6893950288315059 | 0.5000000000000000  |
| 0.6893950288315059 | 0.3106050011684966 | 0.5000000000000000  |

---

## 7. $\beta$ -Pu<sub>16</sub>O<sub>23</sub>

Beta-Pu16 O23

1.000000000000000

|                     |                    |                     |
|---------------------|--------------------|---------------------|
| 7.1758626404266215  | 0.0000000451123670 | -0.0000000000000000 |
| -3.5879321086188645 | 6.2144788854106379 | -0.0000000000000000 |
| -0.0000000000000001 | 0.0000000000000000 | 11.6250200270611277 |

Pu O

16 23

Direct

|                    |                    |                     |
|--------------------|--------------------|---------------------|
| 0.1666666719999981 | 0.3333333429999996 | 0.1181211672423131  |
| 0.1666666719999981 | 0.3333333429999996 | 0.6172712263064412  |
| 0.1666302434863120 | 0.8333151587419565 | 0.1182710862193360  |
| 0.1646512803791248 | 0.8323256772102655 | 0.6184605288179018  |
| 0.6666849012580485 | 0.3333697715136858 | 0.1182710862193360  |
| 0.6676743827897395 | 0.3353487346208656 | 0.6184605288179018  |
| 0.6666849012556434 | 0.8333151587443616 | 0.1182710862193360  |
| 0.6676743828311326 | 0.8323256771688726 | 0.6184605288179018  |
| 0.3333223971021258 | 0.1666776178978717 | 0.3825402788742450  |
| 0.3359068749331593 | 0.1640931400668384 | 0.8771727175439581  |
| 0.3333223970975540 | 0.6666447951996833 | 0.3825402788742450  |
| 0.3359068749238237 | 0.6718137508569866 | 0.8771727175439581  |
| 0.8333552648003215 | 0.1666776179024439 | 0.3825402788742450  |
| 0.8281863091430184 | 0.1640931400761741 | 0.8771727175439581  |
| 0.8333333730000021 | 0.6666666870000029 | 0.3904430732544931  |
| 0.8333333730000021 | 0.6666666870000029 | 0.9017610773262582  |
| 0.0068830695353564 | 0.0137661390686800 | 0.9993116966997139  |
| 0.0000296294369735 | 0.0000592588795829 | 0.5024912400280551  |
| 0.0068830695333237 | 0.4931169304666764 | 0.9993116966997139  |
| 0.0000296294426090 | 0.4999703705573910 | 0.5024912400280551  |
| 0.5000000000000000 | 0.0000000000000000 | -0.0054983588374144 |
| 0.5000000000000000 | 0.0000000000000000 | 0.5056616817751977  |
| 0.4862338609313200 | 0.4931169304646436 | 0.9993116966997139  |
| 0.4999407411204174 | 0.4999703705630265 | 0.5024912400280551  |
| 0.1666666719999981 | 0.3333333429999996 | 0.3183736671736397  |
| 0.1666666719999981 | 0.3333333429999996 | 0.8170230838173305  |
| 0.1650763838033789 | 0.8325382289029001 | 0.3192498879029815  |
| 0.1369721414523165 | 0.8184861077130765 | 0.8092954057361971  |
| 0.6674618310971049 | 0.3349236311966187 | 0.3192498879029815  |
| 0.6815139522869285 | 0.3630278735476872 | 0.8092954057361971  |
| 0.6674618310995124 | 0.8325382289004924 | 0.3192498879029815  |
| 0.6815139522607664 | 0.8184861077392399 | 0.8092954057361971  |
| 0.3344489205743142 | 0.1655510944256834 | 0.1830976282071985  |
| 0.3341954303921517 | 0.1658045846078459 | 0.6815372557674932  |
| 0.3344489205740486 | 0.6688978421483734 | 0.1830976282071985  |

---

|                    |                    |                    |
|--------------------|--------------------|--------------------|
| 0.3341954303996595 | 0.6683908617918151 | 0.6815372557674932 |
| 0.8311022178516314 | 0.1655510944259490 | 0.1830976282071985 |
| 0.8316091982081898 | 0.1658045846003381 | 0.6815372557674932 |
| 0.8333333730000021 | 0.6666666870000029 | 0.1833116605504539 |

## 8. $\beta$ -Pu<sub>16</sub>O<sub>22</sub>

Beta-Pu16 O22

1.0000000000000000

|                     |                    |                     |
|---------------------|--------------------|---------------------|
| 7.1260304100758693  | 0.0000000512925963 | -0.0000000000000000 |
| -3.5630159823449219 | 6.1713229144091688 | 0.0000000000000001  |
| 0.0000000000000000  | 0.0000000000000001 | 11.6232405387481847 |

Pu O

16 22

Direct

|                    |                     |                     |
|--------------------|---------------------|---------------------|
| 0.1666666719999981 | 0.3333333429999996  | 0.1176294735541783  |
| 0.1666666719999981 | 0.3333333429999996  | 0.6176294665541814  |
| 0.1627943617019736 | 0.8313972178690093  | 0.1189146884978388  |
| 0.1627943617019736 | 0.8313972178690093  | 0.6189146814978415  |
| 0.6686028421309956 | 0.3372056532980173  | 0.1189146884978388  |
| 0.6686028421309956 | 0.3372056532980173  | 0.6189146814978415  |
| 0.6686028421670347 | 0.8313972178329775  | 0.1189146884978388  |
| 0.6686028421670347 | 0.8313972178329775  | 0.6189146814978415  |
| 0.3364093043696105 | 0.1635907106303882  | 0.3786246707916261  |
| 0.3364093043696105 | 0.1635907106303882  | 0.8786246707916261  |
| 0.3364093043463470 | 0.6728186097159600  | 0.3786246707916261  |
| 0.3364093043463470 | 0.6728186097159600  | 0.8786246707916261  |
| 0.8271814502840439 | 0.1635907106536508  | 0.3786246707916261  |
| 0.8271814502840439 | 0.1635907106536508  | 0.8786246707916261  |
| 0.8333333730000021 | 0.6666666870000029  | 0.4101755083050965  |
| 0.8333333730000021 | 0.6666666870000029  | 0.9101755083050966  |
| 0.0074492805972532 | 0.0148985612038494  | 0.0014168149243278  |
| 0.0074492805972532 | 0.0148985612038494  | 0.5014168149243279  |
| 0.0074492806065965 | 0.4925507193934041  | 0.0014168149243278  |
| 0.0074492806065965 | 0.4925507193934041  | 0.5014168149243279  |
| 0.5000000000000000 | -0.0000000000000000 | -0.0002798694351671 |
| 0.5000000000000000 | -0.0000000000000000 | 0.4997201305648327  |
| 0.4851014387961500 | 0.4925507194027468  | 0.0014168149243278  |
| 0.4851014387961500 | 0.4925507194027468  | 0.5014168149243279  |
| 0.1666666719999981 | 0.3333333429999996  | 0.3176738927273645  |
| 0.1666666719999981 | 0.3333333429999996  | 0.8176738927273647  |
| 0.1338445745558428 | 0.8169223242736049  | 0.3102336294183179  |
| 0.1338445745558428 | 0.8169223242736049  | 0.8102336294183180  |
| 0.6830777357264001 | 0.3661554404441519  | 0.3102336294183179  |
| 0.6830777357264001 | 0.3661554404441519  | 0.8102336294183180  |
| 0.6830777357177608 | 0.8169223242822470  | 0.3102336294183179  |

---

|                    |                    |                    |
|--------------------|--------------------|--------------------|
| 0.6830777357177608 | 0.8169223242822470 | 0.8102336294183180 |
| 0.3355129891933669 | 0.1644870258066310 | 0.1826610183173968 |
| 0.3355129891933669 | 0.1644870258066310 | 0.6826610333173946 |
| 0.3355129891977238 | 0.6710259793910868 | 0.1826610183173968 |
| 0.3355129891977238 | 0.6710259793910868 | 0.6826610333173946 |
| 0.8289740806089181 | 0.1644870258022741 | 0.1826610183173968 |
| 0.8289740806089181 | 0.1644870258022741 | 0.6826610333173946 |

## 9. $\beta$ -Pu<sub>16</sub>O<sub>20</sub>

Beta-Pu16 O20

1.0000000000000000

|                     |                     |                     |
|---------------------|---------------------|---------------------|
| 7.0098730056175818  | -0.0064061483531669 | 0.0036648264263567  |
| -3.5104851977894831 | 6.0803369881608234  | -0.0000000005576083 |
| 0.0047771540781246  | 0.0027580912295320  | 11.6819367286318965 |

Pu O

16 20

Direct

|                    |                     |                    |
|--------------------|---------------------|--------------------|
| 0.1592354559608737 | 0.3296177349943026  | 0.1195273080919397 |
| 0.1592354559608737 | 0.3296177349943026  | 0.6195273010919428 |
| 0.1592354559608737 | 0.8296177649943055  | 0.1195273080919397 |
| 0.1592354559608737 | 0.8296177649943055  | 0.6195273010919428 |
| 0.6793526270973417 | 0.3396763130346965  | 0.1193231020061895 |
| 0.6793526270973417 | 0.3396763130346965  | 0.6193230950061926 |
| 0.6793526270973417 | 0.8396763430346986  | 0.1193231020061895 |
| 0.6793526270973417 | 0.8396763430346986  | 0.6193230950061926 |
| 0.3348905643978078 | 0.1674452826931959  | 0.3757348427631041 |
| 0.3348905643978078 | 0.1674452826931959  | 0.8757348427631041 |
| 0.3348905643978078 | 0.6674452976932007  | 0.3757348427631041 |
| 0.3348905643978078 | 0.6674452976932007  | 0.8757348427631041 |
| 0.8224783437697910 | 0.1612391573907815  | 0.4073485186548398 |
| 0.8224783437697910 | 0.1612391573907815  | 0.9073485186548399 |
| 0.8224783437697910 | 0.6612391723907862  | 0.4073485186548398 |
| 0.8224783437697910 | 0.6612391723907862  | 0.9073485186548399 |
| 0.0168841567211484 | 0.0084420783561872  | 0.0012576240548242 |
| 0.0168841567211484 | 0.0084420783561872  | 0.5012576240548240 |
| 0.0168841567211484 | 0.5084420783561870  | 0.0012576240548242 |
| 0.0168841567211484 | 0.5084420783561870  | 0.5012576240548240 |
| 0.4764100516626502 | -0.0117949741639153 | 0.0006215469848563 |
| 0.4764100516626502 | -0.0117949741639153 | 0.5006215469848567 |
| 0.4764100516626502 | 0.4882050258360844  | 0.0006215469848563 |
| 0.4764100516626502 | 0.4882050258360844  | 0.5006215469848567 |
| 0.1323573518245924 | 0.3161786829194566  | 0.3102353032603719 |
| 0.1323573518245924 | 0.3161786829194565  | 0.8102353032603720 |
| 0.1323573518245924 | 0.8161787129194592  | 0.3102353032603719 |
| 0.1323573518245924 | 0.8161787129194592  | 0.8102353032603720 |

---

|                    |                    |                    |
|--------------------|--------------------|--------------------|
| 0.7036736750183923 | 0.3518368369994740 | 0.3045168434729929 |
| 0.7036736750183923 | 0.3518368369994740 | 0.8045168434729931 |
| 0.7036736750183923 | 0.8518368669994766 | 0.3045168434729929 |
| 0.7036736750183923 | 0.8518368669994766 | 0.8045168434729931 |
| 0.3413845505474065 | 0.1706922757758139 | 0.1821863977108768 |
| 0.3413845505474065 | 0.1706922757758139 | 0.6821864127108745 |
| 0.3413845505474065 | 0.6706922907758187 | 0.1821863977108768 |
| 0.3413845505474065 | 0.6706922907758187 | 0.6821864127108745 |

#### 10. $\beta$ -Pu<sub>16</sub>O<sub>18</sub>

Beta-Pu16 O18

1.0000000000000000

|                     |                     |                     |
|---------------------|---------------------|---------------------|
| 6.9172239034526770  | 0.0000000787835836  | 0.0000000000000000  |
| -3.4586126811472209 | 5.9904912028527422  | -0.0000000000000000 |
| -0.0000000000000000 | -0.0000000000000000 | 11.7021015138445410 |

Pu O

16 18

Direct

|                     |                    |                    |
|---------------------|--------------------|--------------------|
| 0.1626335323346142  | 0.3373664826653839 | 0.1192754192901326 |
| 0.1626335323346142  | 0.3373664826653839 | 0.6192754122901358 |
| 0.1626335323517062  | 0.8252670936863259 | 0.1192754192901326 |
| 0.1626335323517062  | 0.8252670936863259 | 0.6192754122901358 |
| 0.6747329663136785  | 0.3373664826482913 | 0.1192754192901326 |
| 0.6747329663136785  | 0.3373664826482913 | 0.6192754122901358 |
| 0.6666666870000029  | 0.8333333730000021 | 0.1184415931183013 |
| 0.6666666870000029  | 0.8333333730000021 | 0.6184415861183044 |
| 0.3333333429999996  | 0.1666666719999981 | 0.3741997627496674 |
| 0.3333333429999996  | 0.1666666719999981 | 0.8741997627496675 |
| 0.3390540844468474  | 0.6695270577170092 | 0.4009582948104927 |
| 0.3390540844468474  | 0.6695270577170092 | 0.9009582948104927 |
| 0.8304730022829958  | 0.1609459305531510 | 0.4009582948104927 |
| 0.8304730022829958  | 0.1609459305531510 | 0.9009582948104927 |
| 0.8304730022701603  | 0.6695270577298440 | 0.4009582948104927 |
| 0.8304730022701603  | 0.6695270577298440 | 0.9009582948104927 |
| 0.0162931029689371  | 0.0081465514782358 | 0.0030792537590917 |
| 0.0162931029689371  | 0.0081465514782358 | 0.5030792537590917 |
| -0.0000000000000000 | 0.5000000000000000 | 0.0011729506557776 |
| -0.0000000000000000 | 0.5000000000000000 | 0.5011729506557777 |
| 0.4918534485092917  | 0.0081465514907071 | 0.0030792537590917 |
| 0.4918534485092917  | 0.0081465514907071 | 0.5030792537590917 |
| 0.4918534485217641  | 0.4837068970310640 | 0.0030792537590917 |
| 0.4918534485217641  | 0.4837068970310640 | 0.5030792537590917 |
| 0.1497205337047119  | 0.3502794812952837 | 0.3046181899391343 |
| 0.1497205337047119  | 0.3502794812952837 | 0.8046181899391341 |
| 0.1497205337217261  | 0.7994410964264461 | 0.3046181899391343 |

---

|                    |                    |                    |
|--------------------|--------------------|--------------------|
| 0.1497205337217261 | 0.7994410964264461 | 0.8046181899391341 |
| 0.7005589635735608 | 0.3502794812782715 | 0.3046181899391343 |
| 0.7005589635735608 | 0.3502794812782715 | 0.8046181899391341 |
| 0.6666666870000029 | 0.8333333730000021 | 0.3004030491210535 |
| 0.6666666870000029 | 0.8333333730000021 | 0.8004030491210534 |
| 0.3333333429999996 | 0.1666666719999981 | 0.1842436479586338 |
| 0.3333333429999996 | 0.1666666719999981 | 0.6842436629586315 |
